# Supplementary material for: A pilot randomised controlled trial of personalised care after treatment for prostate cancer (TOPCAT-P): nurse-led holistic-needs assessment and individualised psychoeducational intervention: study protocol
Source: HighWire-hosted journal article supplement (doi:10.1136/bmjopen-2015-008470), 2015-06-01
Supplement: bmjopen-2015-008470supp1.pdf [file bmjopen-2015-008470supp1.pdf]

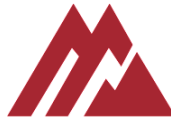

## Appendix 1. Bilingual Participant Information Sheet

### Dalen Wybodaeth i Gyfranogwyr

#### Teitl yr astudiaeth: Treial Gofal Personol ar ôl Triniaeth – Canser y Prostad (TOPCAT-PC)

Hoffem eich gwahodd i gymryd rhan yn ein hastudiaeth ymchwil (gelwir hefyd yn ‘dreial’). Cyn i chi benderfynu, hoffem i chi ddeall pam mae’r ymchwil yn cael ei wneud a beth y byddai’n ei olygu i chi. Bydd ein tîm ymchwil yn hapus i fynd drwy’r ddalen wybodaeth gyda chi ac ateb unrhyw gwestiynau sydd gennych. Hefyd, mae croeso i chi siarad â phobl eraill am yr astudiaeth.

#### Beth yw diben yr astudiaeth?

Rydym yn chwilio drwy’r amser am ffordd gwell o wella eich gofal. Un ffordd o wneud hyn yw edrych ar sut mae cleifion yn teimlo am eu gofal iechyd ar ôl triniaeth. Hoffem weld a fydd cynnig mwy o gymorth i ddynion, a’u galluogi i’w reoli eu hunain, yn helpu i wella eu gwellhad, eu profiad o ofal dilynol, a’u hansawdd bywyd cyffredinol. Gwneir hyn naill ai gyda, neu heb, apwyntiadau dilynol yn eu meddygfa deulu gyda nyrs wedi’i hyfforddi’n arbennig (gan ddibyynu pa un o’r ddau ymyriad a roddir yn yr astudiaeth hon y byddant yn ei gael).

#### Pam yr wyf wedi cael fy ngwahodd?

Cawsoch eich gwahodd i gymryd rhan yn y treial hwn gan fod y Clinigwr sy’n eich trin o’r farn bod eich canser y prostad yn sefydlog ar hyn o bryd, hyd yn oed os ydych yn dal i fynychu apwyntiadau rheolaidd i fonitro ei gyflwr, ac unrhyw ddatblygiadau yn y dyfodol. Hoffem i chi fod yn un o’r 120 o gleifion a fydd yn cymryd rhan yn y treial hwn.

#### Oes rhaid i mi gymryd rhan?

Nac oes. Eich penderfyniad chi yw ymuno â’r astudiaeth. Os penderfynwch gymryd rhan yn y treial, cysylltwch â Rheolwr y Treial. Byddwn yn disgrifio’r astudiaeth ac yn eich arwain drwy’r ddalen wybodaeth hon. Os cytunwch i gymryd rhan, byddwn yna’n gofyn i chi lofnodi ffurflen caniatâd. Fodd bynnag, ar ôl hynny, cewch dynnu’n ôl o’r astudiaeth unrhyw bryd, heb roi rheswm. Ni fyddai hyn yn effeithio ar y gofal rheolaidd a gewch.

#### Beth fydd yn digwydd i mi os wyf yn cymryd rhan? Beth fydd gofyn i mi ei wneud?

Cewch eich gwahodd i gyfarfod â’r Swyddog Ymchwil, drwy gydgytundeb, yn eich meddygfa deulu leol, eich ysbyty cymunedol lleol, neu ganolfan ymchwil, i lofnodi’r ffurflen caniatâd a llenwi holiadur yn ymwneud ag iechyd. Cewch yr holl gymorth sydd ei angen i lenwi’r holiadur, ac, ar ôl gorffen, cewch ei roi’n ôl ar unwaith. Cewch hefyd lenwi’r holiadur yn nes ymlaen, os byddai hynny’n well gennych.

Profir dau wahanol ymyriad yn y treial hwn. Dim ond mewn un o’r ddau y byddwch yn cymryd rhan; bydd cyfrifiadur yn dewis pa un ar hap. Ni fydd neb yn gallu dylanwadu ar eich dyraniad. Bydd cyfranogwyr mewn un grŵp yn cael amrywiaeth o ddeunydd gwybodaeth a chymorth i’w ddefnyddio eu hunain. Bydd y grŵp arall yn cael cynnig yr un deunyddiau, a gofynnir iddynt hefyd fod yn bresennol mewn apwyntiad cychwynnol gyda Nyrs Glinigol Arbenigol, ac mewn apwyntiadau dilynol posibl (os yw’r cleifion yn gofyn amdanynt yn yr ymyriad hwnnw). Ar y ffurflen caniatâd, byddwn yn gofyn am eich caniatâd i wneud recordiadau sain o’r apwyntiadau hyn (rhag ofn y caiff yr ymyriad hwn ei ddyrannu i chi), i sicrhau nad ydym yn methu unrhyw beth o’r sesiynau hyn. Cynhelir yr apwyntiadau yn y feddygfa deulu leol, neu yn yr uned ymchwil ger Ysbyty Maelor yn Wrecsam.

Bydd yr astudiaeth yn para 9 mis. Yn ystod y cyfnod hwn, gofynnir i chi lenwi tri holiadur dyddiadur (un bob tri mis) i gofnodi pa mor aml yr ydych yn gweld eich meddyg teulu a/neu weithwyr proffesiynol gofal iechyd a gwasanaethau cymdeithasol eraill. Ar ddiwedd y 9 mis, cewch yr un holiadur i’w lenwi ag y gwnaethoch ei lenwi ar y dechrau. Bydd y ffurflen caniatâd hefyd yn gofyn i chi a hoffech gymryd rhan mewn cyfweiliad ar ddiwedd yr astudiaeth, i ddweud wrthym pa mor ddefnyddiol oedd yr astudiaeth i chi. Bydd cyfrifiadur yn dewis grŵp bach o gyfranogwyr o’r rheini a gytunodd i gymryd rhan, a gwahoddir y rhain i gyfweiliad 45 munud.

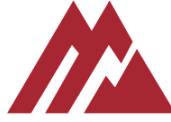

Wedi i ni ddadansoddi'r holl ddata a gesglir gan y 120 o gyfranogwyr, cynigir canlyniadau'r astudiaeth gyfan i chi. Bydd y canlyniadau'n gwbl gyfrinachol ac yn cyfeirio at y 120 o gyfranogwyr i gyd. Ni fydd yn bosibl adnabod eich data unigol (atebion, sgorau ac ati) mewn unrhyw ffordd.

### **Ar ôl i mi gymryd rhan, a gaf i newid fy meddwl?**

Cewch. Os hoffech dynnu'n ôl unrhyw bryd yn ystod y treial, cysylltwch â Rheolwr y Treial neu'r Swyddog Ymchwil i roi gwybod iddynt. Ni wnânt ofyn pam yr ydych yn tynnu'n ôl, ac ni fydd cymryd rhan yn y treial hwn, na thynnu'n ôl oddi wrtho, yn effeithio mewn unrhyw ffordd ar eich gofal meddygol parhaus.

### **A gaf i unrhyw dâl am gymryd rhan?**

Na chewch. Ni chewch ddim arian am gymryd rhan, ac ni allwn dalu am dreuliau megis costau teithio ac ati.

### **Beth yw anfanteision a risgiau posibl cymryd rhan?**

Ni ddylai cymryd rhan yn yr astudiaeth hon beri unrhyw risgiau nac anfanteision i chi. Os yw'n anghyfforddus i chi ateb unrhyw rannau o'r holiadur hwn, cewch adael y rhannau hynny'n wag. Os cewch eich dyrannu i'r ymyriad sy'n cynnwys apwyntiad gyda Nyrs Glinigol Arbenigol yn eich meddygfa deulu leol, neu yn yr uned ymchwil, chi fydd yn gyfrifol am y teithio.

### **A gaiff fy rhan yn yr astudiaeth ei chadw'n gyfrinachol?**

Caiff; cedwir eich holl atebion yn gyfrinachol. Ni chaiff eich enw ei gysylltu â'r atebion a rowch yn yr holiaduron. Caiff y data a gesglir gennym yn ystod yr astudiaeth (holiadur a recordiadau sain) eu cadw'n ddiogel, mewn cwpwrdd ffeilio wedi'i gloi, a chânt eu dinistrio'n gyfrinachol 5 mlynedd ar ôl diwedd yr astudiaeth, yn unol â'r gyfraith a'r canllawiau moesegol perthnasol.

Yn y ffurflen caniatâd, byddwn yn gofyn i chi a ydych yn fodlon i ni ddweud wrth eich meddyg teulu presennol eich bod yn cymryd rhan yn yr astudiaeth hon. Chi fydd yn penderfynu a hoffech i hyn ddiogwydd a byddwn yn gwneud beth bynnag y penderfynwch chi. Ni wnawn ddweud wrth neb arall eich bod yn cymryd rhan yn yr astudiaeth hon, a byddwn yn trin popeth a ddywedwch wrthym yn gwbl gyfrinachol. Fodd bynnag, os gwnawn ddarganfod rhywbeth yn ystod yr astudiaeth a allai beryglu eich bywyd, neu fywydau unrhyw bobl eraill, mae'n ddyletswydd arnom i hysbysu'r arbenigwyr hynny a all eich achub chi a phawb arall a all fod mewn perygl.

### **Pwy sydd wedi adolygu'r astudiaeth?**

Mae'r astudiaeth wedi cael ei hadolygu gan Bwyllgor Moeseg Academiaidd yr Ysgolion Gofal Iechyd a Gwyddorau Meddygol ym Mhrifysgol Bangor, gan Bwyllgor Moeseg Ymchwil Gogledd Cymru (Canol a Dwyrain), a gan Banel Adolygu Mewnol Ymchwil a Datblygu Bwrdd Iechyd Prifysgol Betsi Cadwaladr.

### **Mae gennyf fwy o gwestiynau, pwy ddylwn i gysylltu â hwy?**

Os oes gennych unrhyw gwestiynau, cysylltwch ag Andrei Stanciu (Rheolwr y Treial) ar: 01978726078, neu drwy e-bost yn: [a.stanciu@bangor.ac.uk](mailto:a.stanciu@bangor.ac.uk), neu Marie Burrows (Swyddog Ymchwil), ar: 01248388835, neu drwy e-bost yn: [m.burrows@bangor.ac.uk](mailto:m.burrows@bangor.ac.uk).

### **Beth os nad wyf yn hapus â'r ffordd y cafodd yr ymchwil ei gyflawni?**

Os ydych yn anhapus ag unrhyw rannau o'r astudiaeth, rhoch wybod i'r tîm ymchwil, a byddant yn gwneud popeth a allant i ddatrys unrhyw broblemau. Fodd bynnag, os oes gennych bryderon neu gwynion, cysylltwch â'r Athro Joanne Rycroft-Malone, Pennaeth yr Ysgol Gwyddorau Gofal Iechyd, Prifysgol Bangor, 01248383117, e-bost: [j.rycroft-malone@bangor.ac.uk](mailto:j.rycroft-malone@bangor.ac.uk), neu dîm Pryderon Bwrdd Iechyd Prifysgol Betsi Cadwaladr yn y cyfeiriad e-bost canlynol: ([ConcernsTeam.bcu@wales.nhs.uk](mailto:ConcernsTeam.bcu@wales.nhs.uk)).

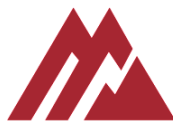

## Participant Information Sheet

### **Study title: Trial of Personalised Care After Treatment – Prostate Cancer (TOPCAT-PC)**

We would like to invite you to take part in our research study (also known as a ‘trial’). Before you decide, we would like you to understand why the research is being done and what it would involve for you. Our research team will be happy to go through the information sheet with you and answer any questions you have. Also, please talk to others about the study, if you wish.

#### **What is the purpose of the study?**

We are continually looking for better ways to improve your care. One way of doing this is to look at how patients feel about their health care after treatment. We want to see if offering men extra support, that they can manage themselves, will help to improve their recovery, experience of follow-up care, and overall quality of life. This will be done either with, or without follow-up appointments at their GP surgery with a specially trained nurse (according to which intervention they will receive from the two administered in this study).

#### **Why have I been invited?**

You have been invited to take part in this trial, because your treating Clinician considered that your prostate cancer is presently stable, even if you might still continue to attend regular appointments to monitor its state, and any future developments. We would like you to be one of the 120 patients who will take part in this trial.

#### **Do I have to take part?**

No. It is up to you to decide to join the study. If you decide to take part in the trial, please contact the Trial Manager. We will describe the study and go through this information sheet with you. If you agree to take part, we will then ask you to sign a consent form. However, afterwards you can withdraw at any time from the study, without giving a reason. This would not affect the regular care you receive.

#### **What will happen to me if I take part? What will I be asked to do?**

You will be invited to meet the Research Officer, by mutual agreement, in your local GP surgery, local community hospital, or research centre, to sign the consent form and fill in a health-related questionnaire. You will be given all the required assistance in filling in the questionnaire, and, once completed, you can hand it back straight away. You can also fill in the questionnaire at a later time, if you wish so.

There are two different interventions tested in this trial. You will be taking part in only one of them, as determined randomly by a computer. Nobody will be able to influence your allocation. Participants in one group will receive a range of information and support materials that they will use by themselves. The other group will be offered the same materials and will also be asked to attend an initial appointment with a Clinical Nurse Specialist, and possible follow-up appointments (if requested by the patients in that intervention). In the consent form, we will ask for your permission to take audio recordings of these appointments (in case you will be allocated to this intervention), to make sure we don't miss anything from these sessions. The appointments will take place at the local GP practice, or at the research unit, located near the Maelor Hospital in Wrexham.

The study will last for 9 months. During this time, you will also be asked to fill in three diary questionnaires (one every three months) to record how often you see your GP and/or other healthcare and social services professionals. At the end of the 9 months, you will receive for completion the same questionnaire as the one you filled in at the start. In the consent form we will also ask you if you would like to take part in an interview at the end of the study, to tell us how useful the study was for you. A small



group of participants will be selected by a computer from those who agreed to take part, and will be invited to attend a 45 minute interview.

Once we analyse all the data collected from the 120 participants, you will be offered the overall results of the study. The results will be completely confidential and will refer to the whole 120 participants. Your individual data (answers, scores, etc.) will not be possible to be identified in any way.

### **Once I take part, can I change my mind?**

Yes. If at any time during the trial, you wish to withdraw, please, kindly contact the Trial Manager or the Research Officer to let them know. You will not be asked for a reason for withdrawing and your on-going medical care will never be affected by taking part, or withdrawing from this trial.

### **Will I receive any payment for taking part?**

No. You will not receive any money for taking part, and we will not be able to cover any expenses, such as travel expenses, etc.

### **What are the possible disadvantages and risks of taking part?**

Taking part in this study should not present any risks or disadvantages for you. If answering any parts of the questionnaire is uncomfortable, you can leave those blank. If you will be allocated to the intervention involving an appointment with a Clinical Nurse Specialist at your local GP surgery, or at the research unit, you will be responsible for the travel.

### **Will my taking part in the study be kept confidential?**

Yes, all your answers are kept confidential. Your identity will not be linked with the answers you provide in the questionnaires. The data we collected during the study (questionnaire and audio recordings) will be kept securely, in a locked filing cabinet, and will be confidentially destroyed after 5 years from the end of the study, according with the law and governing ethical guidelines.

In the consent form, we will ask you if you are happy for us to tell your current GP that you are taking part in this study. It is up to you to decide if you would like this to happen and we will do exactly as you decide. We won't tell anybody else that you are taking part in this study, and we will treat everything you tell us, as strictly confidential. However, if during the study we discover something that could put your life in danger, or the lives of any other people, we have a duty to inform those specialists who can save you and everybody else who might be at risk.

### **Who has reviewed the study?**

The study has been reviewed by the Schools of Healthcare and Medical Sciences Academic Ethics Committee of Bangor University, the North Wales Research Ethics Committee (Central and East), and the Research & Development Internal Review Panel of Betsi Cadwaladr University Health Board.

### **I have some more questions who should I contact?**

For any questions, please contact Andrei Stanciu (Trial Manager) at: 01978726078, or by email at: a.stanciu@bangor.ac.uk, or Marie Burrows (Research Officer), at: 01248388835, or by email at: m.burrows@bangor.ac.uk.

### **What if I am not happy with how the research was conducted?**

If you are unhappy with any parts of the study, please let the research team know, and they will do all they can to solve any problems. However, for any concerns or complaints, you can contact: Prof Joanne Rycroft-Malone, Head of the School of Healthcare Sciences, Bangor University, 01248383117, email: j.rycroft-malone@bangor.ac.uk, or the BCUHB Concerns team at the following email: (ConcernsTeam.bcu@wales.nhs.uk).
