# Supplementary material for: A pilot randomised controlled trial of personalised care after treatment for prostate cancer (TOPCAT-P): nurse-led holistic-needs assessment and individualised psychoeducational intervention: study protocol
Source: HighWire-hosted journal article supplement (doi:10.1136/bmjopen-2015-008470), 2015-06-01
Supplement: bmjopen-2015-008470supp2.pdf [file bmjopen-2015-008470supp2.pdf]

Appendix 2. Bilingual Participant Consent Form

**FFURFLEN CANIATÂD**

Teitl y Prosiect: Treial Gofal Personol ar ôl Triniaeth – Canser y Prostad (TOPCAT-P)

Prif Ymchwiliwr: Yr Athro Clare Wilkinson

Rhowch eich  
blaenlythrennau ym  
mhob blwch yr ydych yn  
rhoi caniatâd ar ei gyfer

1. Rwyf yn cadarnhau fy mod wedi darllen a deall y Ddalen Wybodaeth i Gyfranogwyr dyddiedig 09-09-2013 (fersiwn 1.1) ar gyfer yr astudiaeth uchod. Rwyf wedi cael cyfle i ystyried yr holl wybodaeth a roddwyd ac i ofyn cwestiynau, ac rwyf wedi cael atebion boddhaol.
2. Rwyf yn deall bod fy nghyfranogiad yn wirfoddol a'm bod yn rhydd i dynnu'n ôl unrhyw bryd, heb roi rheswm, ac na fydd hynny'n effeithio ar fy ngofal meddygol na fy hawliau cyfreithiol.
3. Rwyf yn rhoi fy nghaniatâd i gael cynnig un o'r ddwy ffordd o gyflenwi'r cymorth a ddarperir yn yr astudiaeth hon ar hap. Rwyf yn deall mai cyfrifiadur sy'n gwneud y penderfyniad rhwng y ddau ddewis, ac na fyddaf i, na thîm yr astudiaeth, yn gallu newid y penderfyniad. I sicrhau bod yr astudiaeth yn wyddonol, dim ond am y cymorth yr wyf yn ei gael y gallaf gael gwybod.
4. Rwyf yn deall y gall rhan benodol o'r tîm ymchwil edrych ar adrannau perthnasol yn fy nodiadau meddygol, lle bo hyn yn gwbl hanfodol i fy nghyfranogiad yn yr ymchwil. Hefyd, bydd unrhyw ddata o'r fath a gesglir at ddibenion dadansoddi'n gwbl ddiennw (felly bydd yn amhosibl canfod pwy ydw i). Rwyf yn rhoi caniatâd i ymchwilyr weld fy nghofnodion.
5. Rwyf yn rhoi caniatâd i ymchwilyr wneud recordiadau sain o'n cyfarfodydd neu alwadau ffôn, i helpu'r broses o gasglu data. Caiff y recordiadau hyn i gyd eu codio'n ddiennw (fel y bydd yn amhosibl canfod pwy ydw i), cânt eu storio'n ddiogel, a chânt eu dinistrio'n gyfrinachol 5 mlynedd ar ôl diwedd yr astudiaeth.
6. Rwyf yn caniatáu i chi hysbysu fy meddyg teulu fy mod yn cymryd rhan yn yr astudiaeth.
7. Hoffwn gymryd rhan mewn cyfweiliad adborth byr ar ddiwedd y treial.
8. Hoffwn i fy manylion cyswllt gael eu defnyddio i dderbyn canlyniadau'r astudiaeth.
9. Rwyf yn cytuno i gymryd rhan yn yr astudiaeth uchod.

Rhowch eich manylion cyswllt, os gwelwch yn dda:

Rhif ffôn: \_\_\_\_\_ E-bost: \_\_\_\_\_

Cyfeiriad: \_\_\_\_\_

Enw'r Cyfranogwr

Dyddiad

Llofnod

Enw'r ymchwilydd sy'n cymryd y caniatâd

Dyddiad

Llofnod

## CONSENT FORM

Title of Project: Trial of Personalised Care After Treatment – Prostate cancer (TOPCAT-P)

Principal Investigator: Prof. Clare Wilkinson

Please initial each box  
you consent with

1. I confirm that I have read and understood the Participant Information Sheet dated 09-09-2013 (version 1.1) for the above study. I have had the opportunity to consider all the information presented, to ask questions and I have received satisfactory answers.
2. I understand that my participation is voluntary and that I am free to withdraw at any time without giving any reason, and without my medical care or legal rights being affected.
3. I give my consent to be randomly offered one of the two ways of delivering the support provided in this study. I understand that the decision between the two options is made by a computer, and that neither I, nor the study team will be able to change it. To insure the study is scientific, I can only be told about the support that I am receiving.
4. I understand that relevant sections of my medical notes may be confidentially looked at by a limited part of the research team, where this is absolutely essential for my participation in the study. Also, any such data collected for analysis purposes will be entirely anonymised (so my identity will be impossible to trace). I give my permission for researchers to have access to my records.
5. I give my permission for researchers to take audio recordings of our meetings or telephone calls, to help the data collection process. All these recordings will be coded anonymously (so my identity will be impossible to trace), they will be stored securely, and will be confidentially destroyed after 5 years from the end of the study.
6. I agree to my GP being informed of my participation in the study.
7. I would like to take part in a brief feedback interview, at the end of the trial.
8. I would like my contact details to be used to receive the study results.
9. I agree to take part in the above study.

Please, provide your preferred contact details:

Telephone: \_\_\_\_\_ Email: \_\_\_\_\_

Address: \_\_\_\_\_

\_\_\_\_\_  
Name of Participant

\_\_\_\_\_  
Date

\_\_\_\_\_  
Signature

\_\_\_\_\_  
Name of researcher taking consent

\_\_\_\_\_  
Date

\_\_\_\_\_  
Signature
